# Supplementary material for: The Degradation of TMEM166 by Autophagy Promotes AMPK Activation to Protect SH-SY5Y Cells Exposed to MPP+
Source: MDPI journal article supplement (doi:10.3390/cells11172706), 2022-08-30
Supplement: s1 [file s1]

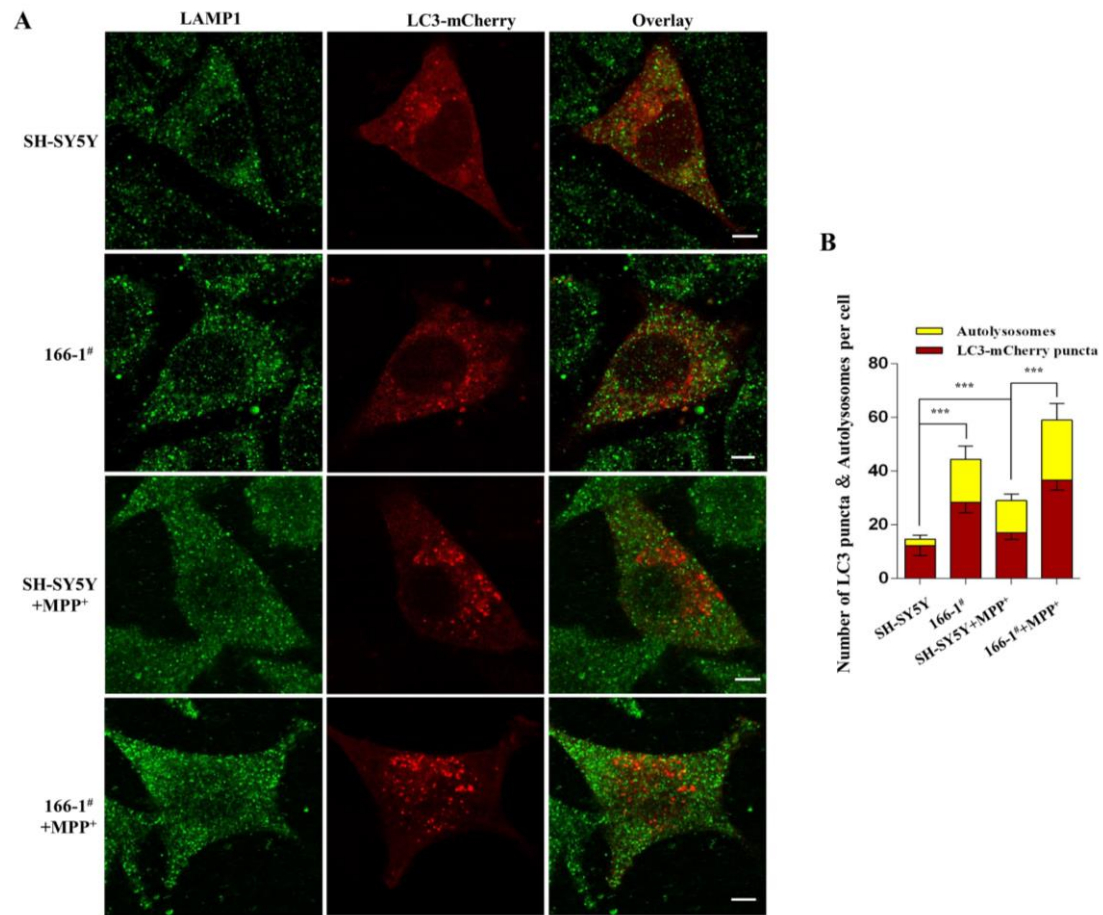

Supplementary Figure S1. Observation of LC3-mCherry puncta and autolysosome. (A) SH-SY5Y cells and 166-1<sup>#</sup> cells transfected with LC3-mCherry plasmids were untreated or treated with 1 mM MPP<sup>+</sup> for 24 h, then fixed and stained with LAMP1 antibody, and were imaged by confocal microscopy. Scale bars, 5  $\mu$ m. (B) Statistical analysis of the number of LC3-mCherry dots and the colocalized dots of LC3-mCherry with LAMP1 per cell. \*\*\*  $p < 0.001$

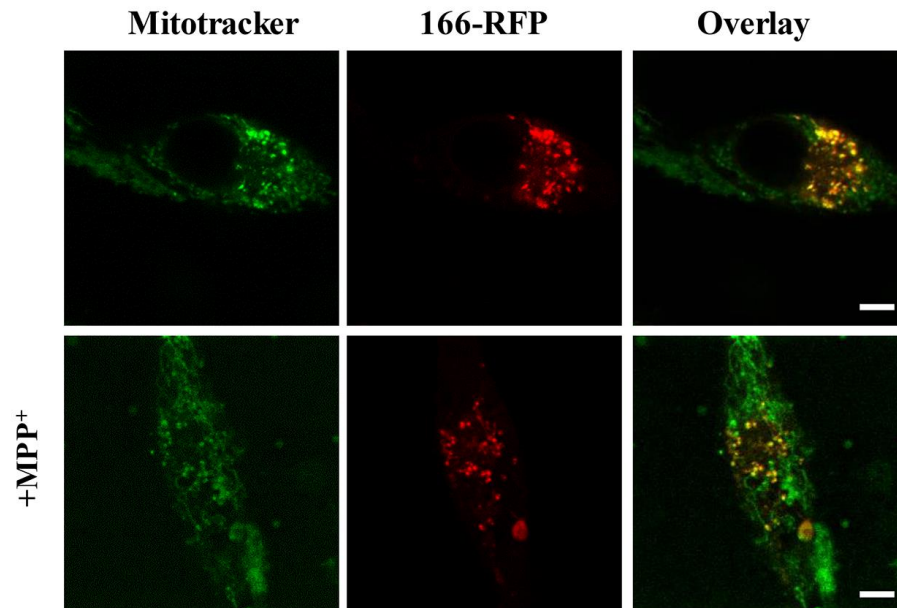

Supplementary Figure S2. TMEM166 is located in mitochondria. Observation of the co-localization of mitochondria and TMEM166 molecules in SH-SY5Y cells transfected TMEM166-RFP plasmid with or without MPP<sup>+</sup> treatment (1 mM, 24 h). Note that TMEM166 appears to have linear shapes similar to that of mitochondria. Scale bars, 5  $\mu$ m.
